# Supplementary material for: Development and Experimental Validation of Regularized Machine Learning Models Detecting New, Structurally Distinct Activators of PXR
Source: MDPI journal article supplement (doi:10.3390/cells11081253), 2022-04-07
Supplement: s1 [file s1]

# Supplementary Information

## **Development and experimental validation of regularized machine learning models detecting new, structurally distinct activators of PXR**

Steffen Hirte <sup>1</sup>, Oliver Burk <sup>2,3</sup>, Ammar Tahir <sup>4</sup>, Matthias Schwab <sup>2,5,6</sup>, Björn Windshügel <sup>7,8</sup>, Johannes Kirchmair <sup>1,\*</sup>

<sup>1</sup> Department of Pharmaceutical Sciences, Division of Pharmaceutical Chemistry, Faculty of Life Sciences, University of Vienna, 1090 Vienna, Austria; steffen.hirte@univie.ac.at, johannes.kirchmair@univie.ac.at

<sup>2</sup> Dr. Margarete Fischer-Bosch-Institute of Clinical Pharmacology, Stuttgart; Oliver.Burk@ikp-stuttgart.de

<sup>3</sup> University of Tübingen, Tübingen, Germany

<sup>4</sup> Department of Pharmaceutical Sciences, Division of Pharmacognosy, Faculty of Life Sciences, University of Vienna, 1090 Vienna, Austria; ammar.tahir@univie.ac.at

<sup>5</sup> Departments of Clinical Pharmacology and Biochemistry and Pharmacy, University of Tuebingen, Tübingen, Germany; matthias.schwab@med.uni-tuebingen.de

<sup>6</sup> Cluster of Excellence IFIT (EXC 2180) “Image-Guided and Functionally Instructed Tumor Therapies”, University of Tübingen, Tübingen, Germany

<sup>7</sup> Fraunhofer Institute for Translational Medicine and Pharmacology ITMP, Discovery Research ScreeningPort, Hamburg, Germany; Bjoern.Windshuegel@itmp.fraunhofer.de

<sup>8</sup> Department of Life Sciences and Chemistry, Jacobs University Bremen, Bremen, Germany

\* Correspondence: johannes.kirchmair@univie.ac.at; +43-1-4277-55104

Table S1. Combinations of Hyperparameters Explored by Grid Search.

| Technique              | Parameters        | Explored values                                                                                           |
|------------------------|-------------------|-----------------------------------------------------------------------------------------------------------|
| RandomForestClassifier | n_estimators      | 500                                                                                                       |
|                        | min_samples_split | 0, 1, 2, 4, 8, 16, 32, 64, 128, 256, 512                                                                  |
|                        | min_samples_leaf  | 0, 1, 2, 4, 8, 16, 32, 64, 128, 256, 512                                                                  |
|                        | max_features      | log2, sqrt, 0.1, 0.2, 0.3, 0.4, 0.5                                                                       |
|                        | class_weight      | Balanced / None                                                                                           |
| SVC                    | Min-Max-Scaler    | Yes / No                                                                                                  |
|                        | C                 | $10^{-2}$ , $10^{-1}$ , $10^0$ , $10^1$ , $10^2$ , $10^3$ , $10^4$ , $10^5$                               |
|                        | gamma             | $10^{-9}$ , $10^{-8}$ , $10^{-7}$ , $10^{-6}$ , $10^{-5}$ , $10^{-4}$ , $10^{-3}$ , $10^{-2}$ , $10^{-1}$ |
|                        | class_weight      | Balanced / None                                                                                           |
|                        |                   |                                                                                                           |

Table S2. Optimal Parameters for Each Random Forest Model.

| Features | Gap penalization | min_samples_split | min_samples_leaf | max_features | class_weight |
|----------|------------------|-------------------|------------------|--------------|--------------|
| PC       | no               | 16                | 1                | 0.3          | balanced     |
|          | yes              | 128               | 16               | 0.1          | balanced     |
| FP       | no               | 2                 | 2                | log2         | balanced     |
|          | yes              | 256               | 16               | log2         | balanced     |
| PC + FP  | no               | 64                | 2                | log2         | balanced     |
|          | yes              | 256               | 32               | 0.1          | balanced     |

Table S3. Optimal Parameters for Each Support Vector Machine.

| Features | Gap penalization | MinMaxScaler | C     | gamma     | class_weight |
|----------|------------------|--------------|-------|-----------|--------------|
| PC       | no               | no           | 1000  | $10^{-4}$ | balanced     |
|          | yes              | no           | 100   | $10^{-5}$ | balanced     |
| FP       | no               | no           | 10000 | $10^{-6}$ | balanced     |
|          | yes              | no           | 1     | $10^{-3}$ | balanced     |
| PC + FP  | no               | no           | 1000  | $10^{-5}$ | balanced     |
|          | yes              | no           | 100   | $10^{-5}$ | balanced     |

Table S4. Important Features in the Random Forest Model Trained on Physicochemical and Fingerprint Features, and Optimized with Gap Penalization.

| Rank | Feature                                                                             | Importance | Rank | Feature                                                                               | Importance |
|------|-------------------------------------------------------------------------------------|------------|------|---------------------------------------------------------------------------------------|------------|
| 1    | esol                                                                                | 0.162183   | 43   | 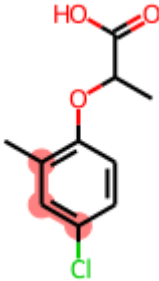   | 0.001799   |
| 2    | refractivity                                                                        | 0.121561   | 44   |     | 0.001656   |
| 3    | logp                                                                                | 0.118305   | 45   |   | 0.001443   |
| 4    | n_heavy                                                                             | 0.069898   | 46   |  | 0.001356   |
| 5    |  | 0.057798   | 47   |   | 0.001290   |

|    |                      |          |    |                                                                                       |          |
|----|----------------------|----------|----|---------------------------------------------------------------------------------------|----------|
| 6  | tpsa                 | 0.050792 | 48 | 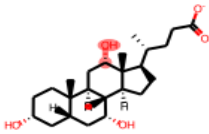    | 0.001228 |
| 7  | n_rings              | 0.043200 | 49 |     | 0.001209 |
| 8  | weight               | 0.040083 | 50 |     | 0.001094 |
| 9  | frac_rotatable_bonds | 0.028083 | 51 |    | 0.001087 |
| 10 |                      | 0.026525 | 52 |   | 0.000996 |
| 11 | n_ar                 | 0.021032 | 53 | n_halogens                                                                            | 0.000941 |
| 12 |                      | 0.018964 | 54 |  | 0.000938 |

13

n\_rotatable\_bonds

0.018753

55

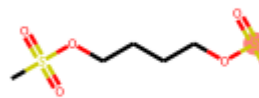

0.000921

14

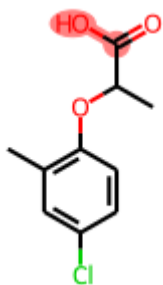

0.018139

56

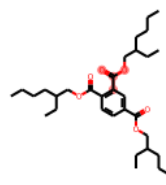

0.000804

15

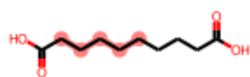

0.018040

57

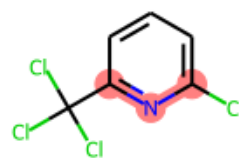

0.000758

16

n\_sp3c

0.016106

58

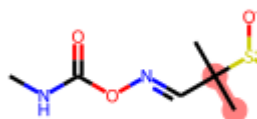

0.000737

17

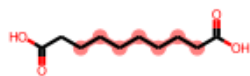

0.013996

59

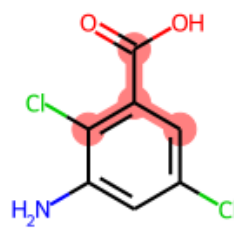

0.000696

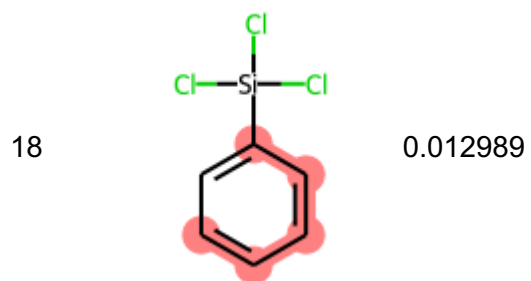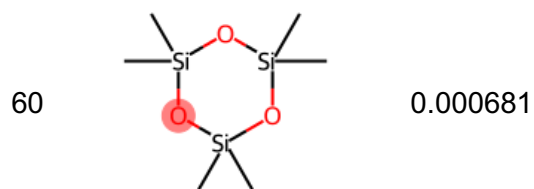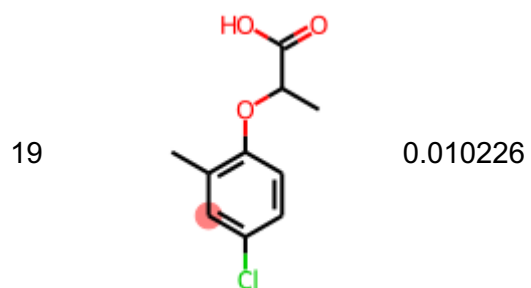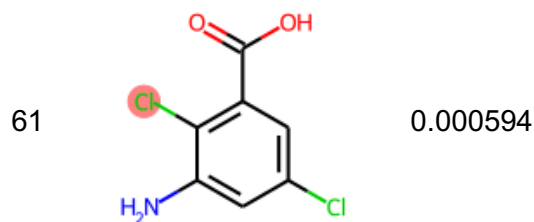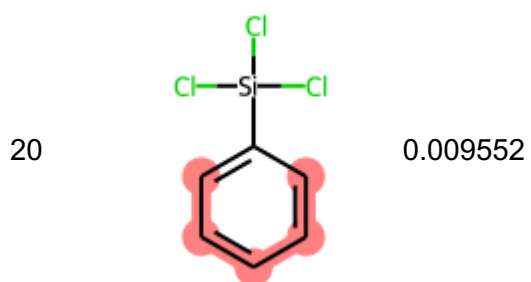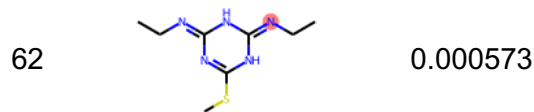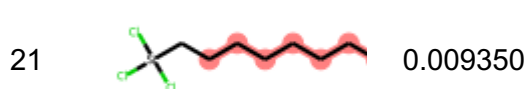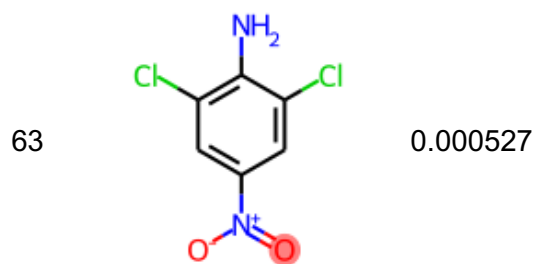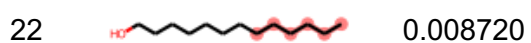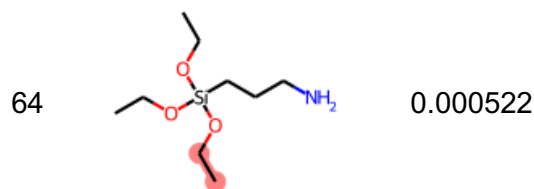

23

n\_O

0.007863

65

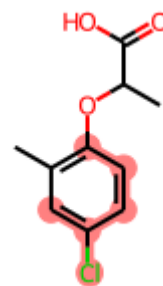

0.000422

24

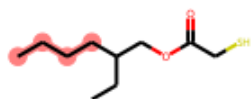

0.006749

66

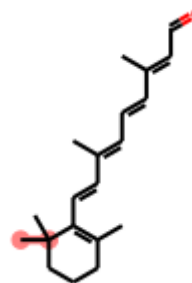

0.000391

25

n\_hbd

0.006624

67

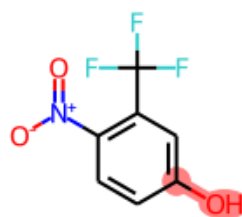

0.000387

26

n\_hba

0.005833

68

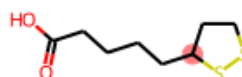

0.000380

27

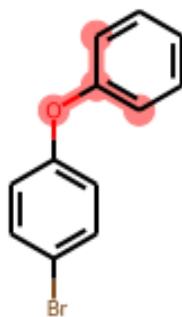

0.004984

69

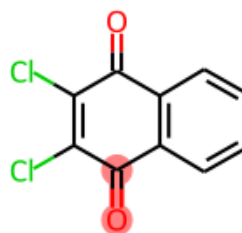

0.000347

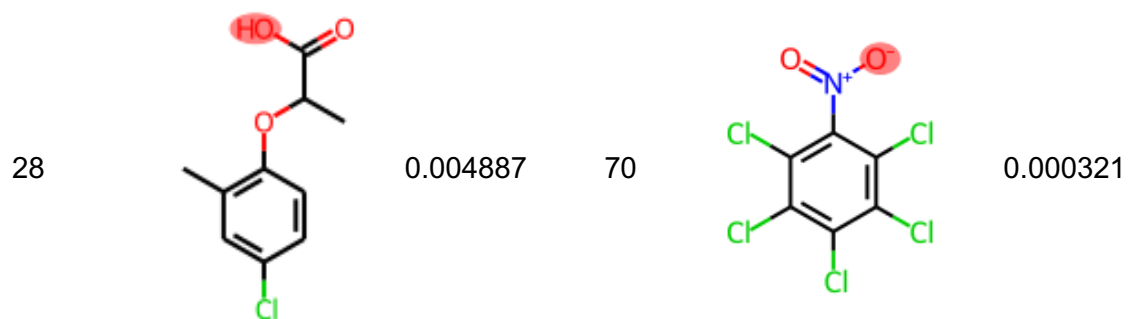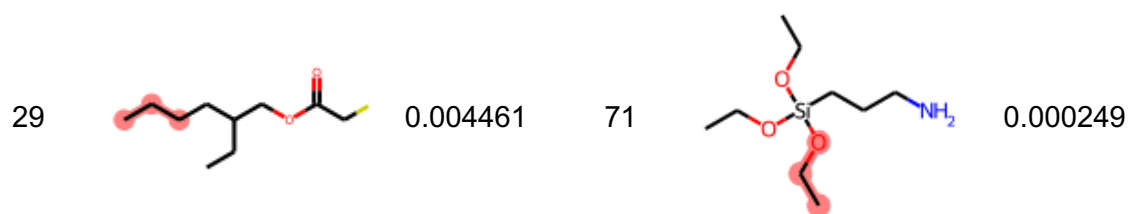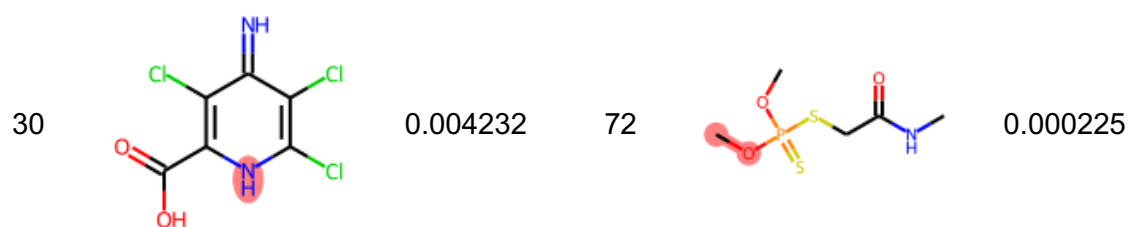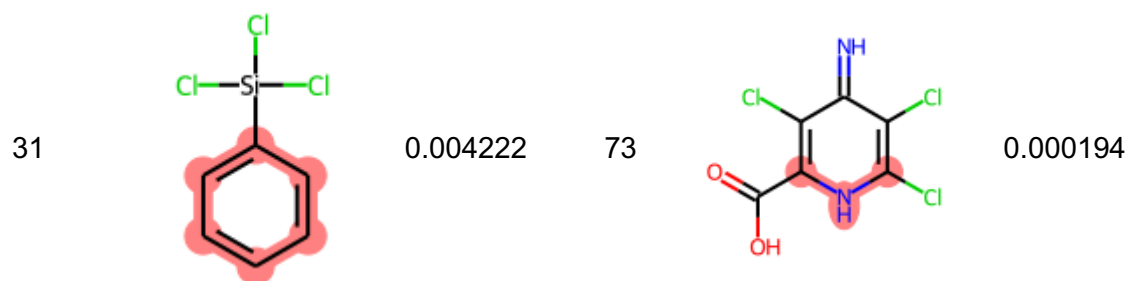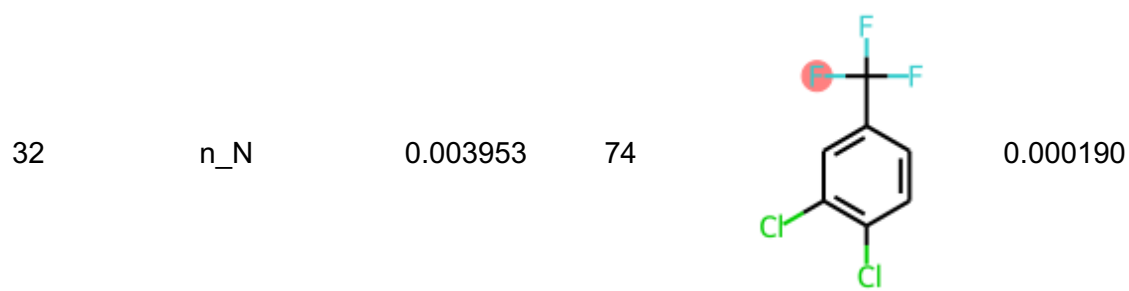



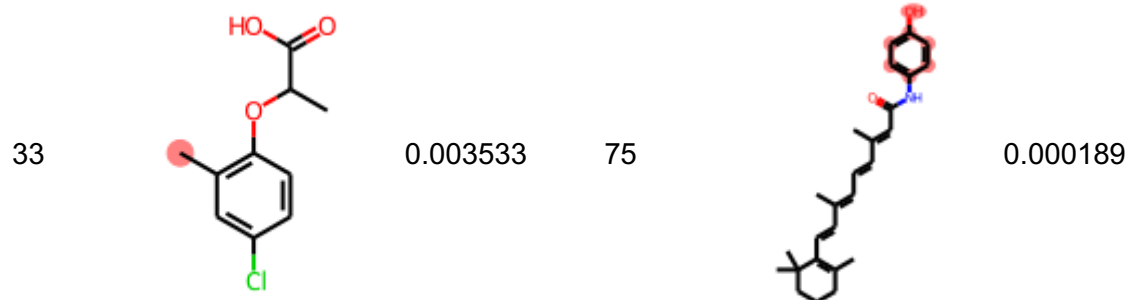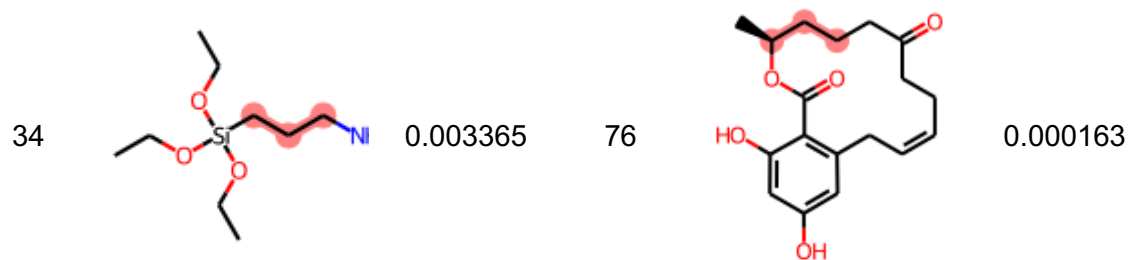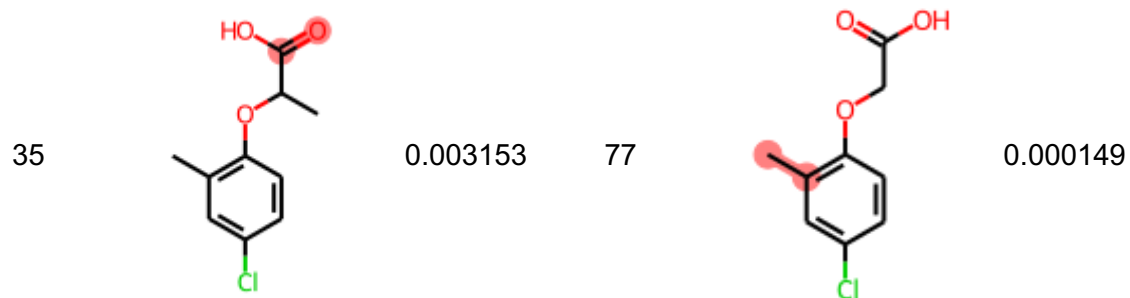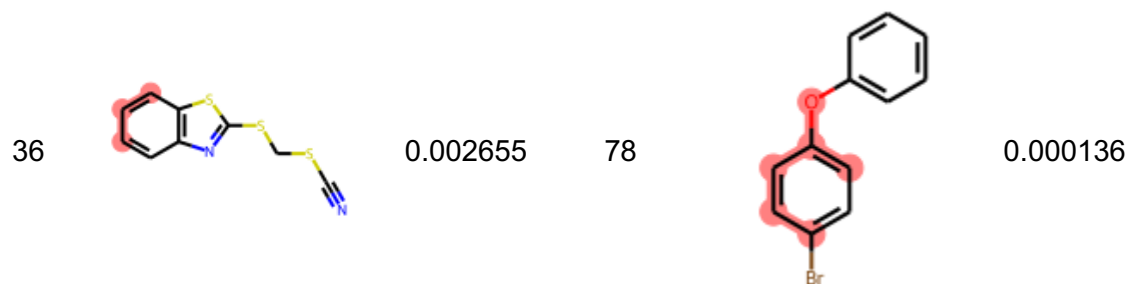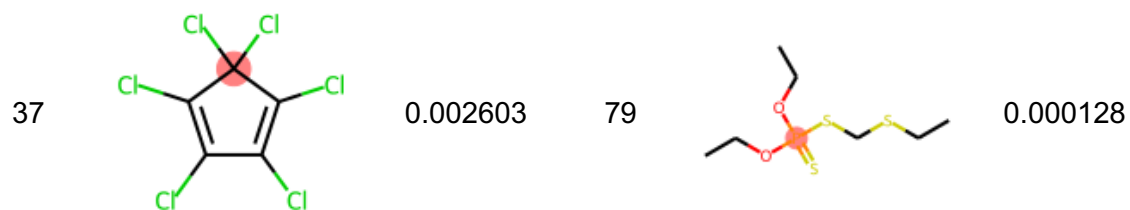

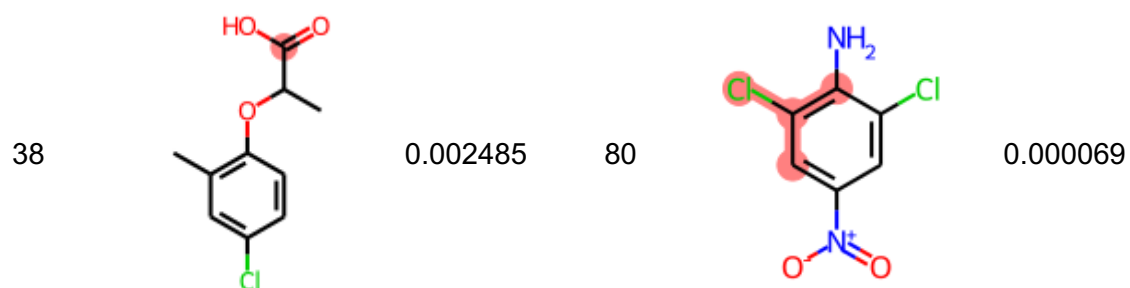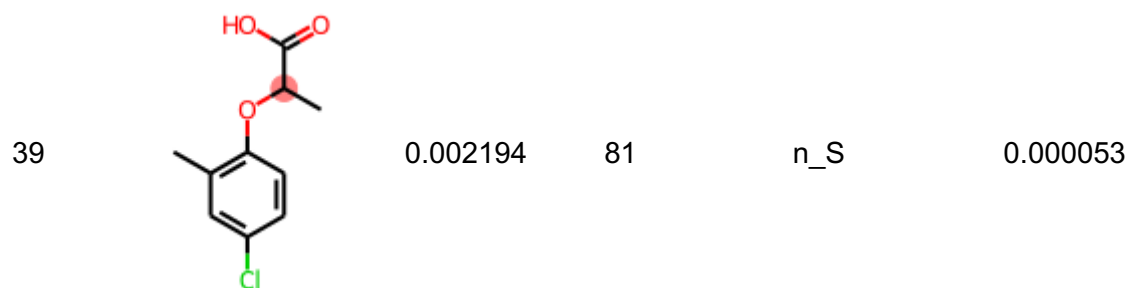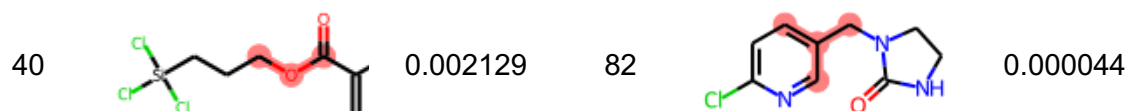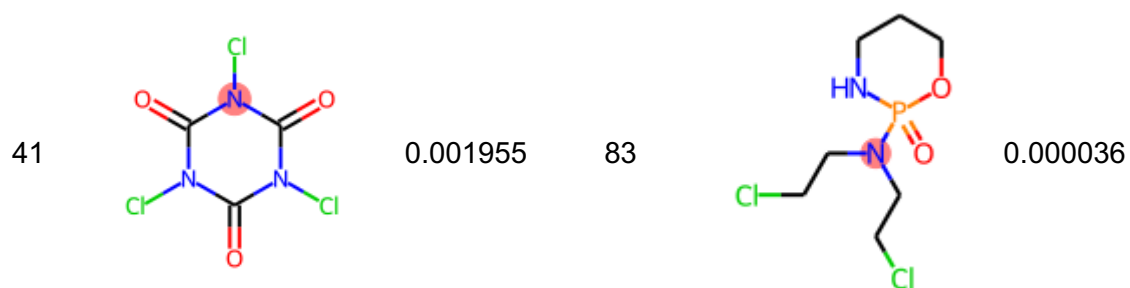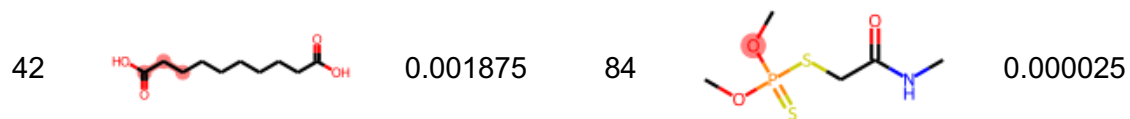

<sup>1</sup> Most frequent pattern illustrated in an example molecule and highlighted in red.

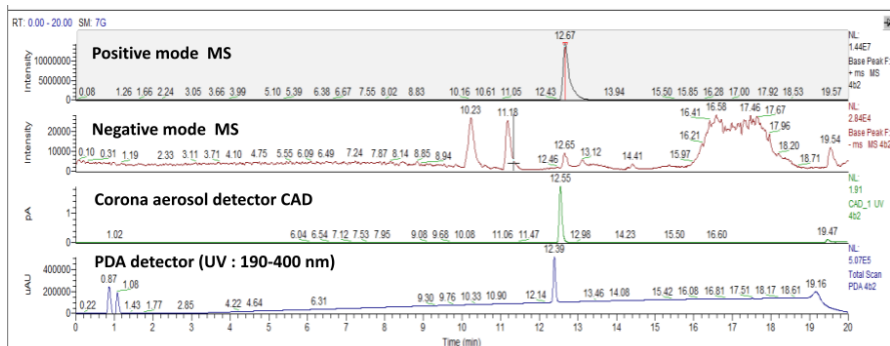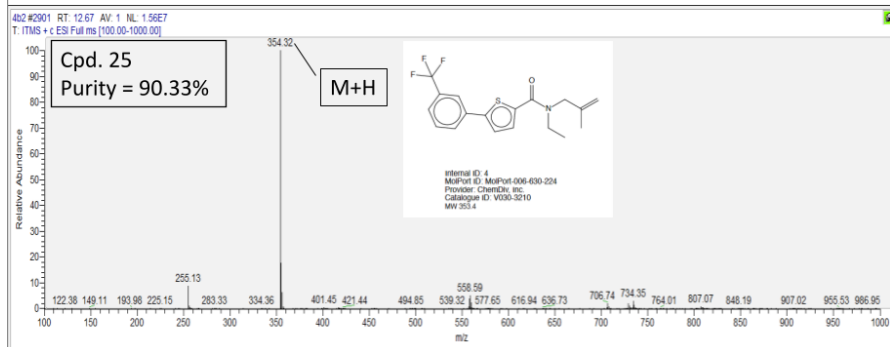

| PEAK LIST                    |          |        |       |       |        |         |  |
|------------------------------|----------|--------|-------|-------|--------|---------|--|
| 4b2.raw                      |          |        |       |       |        |         |  |
| RT: 0.00 - 19.99             |          |        |       |       |        |         |  |
| Number of detected peaks: 34 |          |        |       |       |        |         |  |
| Apex RT                      | Start RT | End RT | Area  | %Area | Height | %Height |  |
| 1.02                         | 0.94     | 1.13   | 0.1   | 1.06  | 0.02   | 1.01    |  |
| 1.24                         | 1.17     | 1.36   | 0.016 | 0.17  | 0.003  | 0.13    |  |
| 7.95                         | 7.92     | 7.98   | 0.001 | 0.02  | 0.001  | 0.04    |  |
| 8                            | 7.98     | 8.04   | 0.002 | 0.02  | 0.001  | 0.04    |  |
| 8.74                         | 8.71     | 8.78   | 0.003 | 0.03  | 0.001  | 0.06    |  |
| 9.01                         | 8.97     | 9.03   | 0.002 | 0.02  | 0.001  | 0.04    |  |
| 9.08                         | 9.03     | 9.13   | 0.006 | 0.06  | 0.002  | 0.08    |  |
| 9.17                         | 9.13     | 9.21   | 0.002 | 0.03  | 0.001  | 0.05    |  |
| 9.35                         | 9.28     | 9.37   | 0.003 | 0.05  | 0.002  | 0.08    |  |
| 9.48                         | 9.41     | 9.53   | 0.004 | 0.05  | 0.001  | 0.05    |  |
| 9.6                          | 9.58     | 9.65   | 0.002 | 0.03  | 0.001  | 0.05    |  |
| 9.68                         | 9.67     | 9.71   | 0.002 | 0.02  | 0.001  | 0.06    |  |
| 10.08                        | 9.97     | 10.17  | 0.052 | 0.55  | 0.008  | 0.4     |  |
| 10.22                        | 10.2     | 10.26  | 0.004 | 0.04  | 0.001  | 0.06    |  |
| 10.28                        | 10.26    | 10.29  | 0.001 | 0.02  | 0.001  | 0.05    |  |
| 10.31                        | 10.29    | 10.34  | 0.003 | 0.03  | 0.001  | 0.06    |  |
| 10.45                        | 10.39    | 10.51  | 0.021 | 0.22  | 0.004  | 0.19    |  |
| 10.53                        | 10.51    | 10.59  | 0.008 | 0.09  | 0.003  | 0.17    |  |
| 10.72                        | 10.62    | 10.75  | 0.008 | 0.08  | 0.001  | 0.07    |  |
| 11.06                        | 10.98    | 11.17  | 0.04  | 0.43  | 0.007  | 0.36    |  |
| 11.34                        | 11.29    | 11.43  | 0.007 | 0.07  | 0.001  | 0.06    |  |
| 12.55                        | 12.47    | 12.64  | 8.552 | 90.33 | 1.808  | 90.73   |  |
| 13                           | 12.95    | 13.05  | 0.004 | 0.04  | 0.001  | 0.05    |  |
| 13.52                        | 13.5     | 13.55  | 0.002 | 0.02  | 0.002  | 0.08    |  |
| 13.69                        | 13.6     | 13.74  | 0.003 | 0.04  | 0.001  | 0.04    |  |
| 14.22                        | 14.16    | 14.31  | 0.008 | 0.09  | 0.002  | 0.08    |  |
| 15.39                        | 15.36    | 15.42  | 0.003 | 0.03  | 0.001  | 0.04    |  |
| 15.5                         | 15.42    | 15.58  | 0.035 | 0.37  | 0.008  | 0.39    |  |
| 16.6                         | 16.53    | 16.69  | 0.011 | 0.12  | 0.002  | 0.11    |  |
| 16.92                        | 16.81    | 17.05  | 0.008 | 0.08  | 0.001  | 0.04    |  |
| 19.47                        | 19.39    | 19.58  | 0.489 | 5.17  | 0.091  | 4.55    |  |
| 19.72                        | 19.67    | 19.77  | 0.014 | 0.15  | 0.004  | 0.18    |  |
| 19.78                        | 19.77    | 19.82  | 0.008 | 0.08  | 0.004  | 0.21    |  |
| 19.89                        | 19.83    | 19.98  | 0.04  | 0.42  | 0.008  | 0.4     |  |

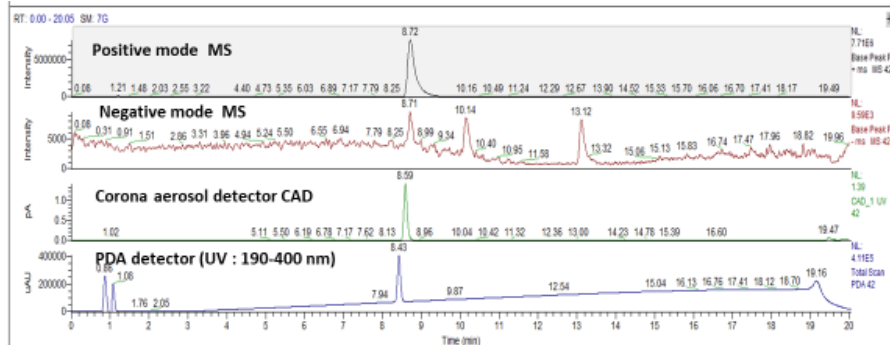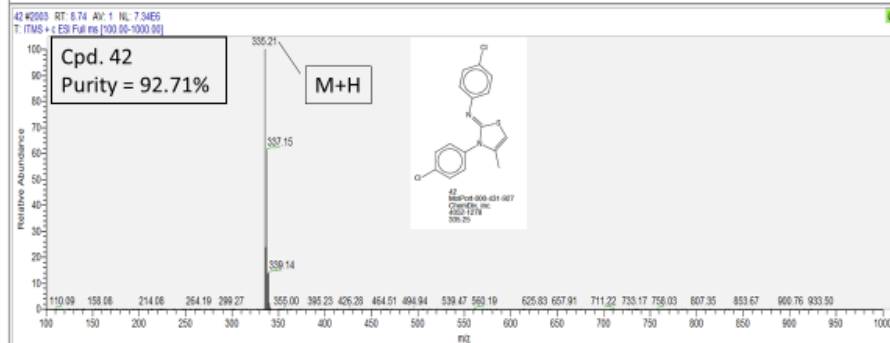

| PEAK LIST                    |          |        |       |       |        |         |  |
|------------------------------|----------|--------|-------|-------|--------|---------|--|
| 42.raw                       |          |        |       |       |        |         |  |
| RT: 0.00 - 20.00             |          |        |       |       |        |         |  |
| Number of detected peaks: 30 |          |        |       |       |        |         |  |
| Apex RT                      | Start RT | End RT | Area  | %Area | Height | %Height |  |
| 1.02                         | 0.95     | 1.13   | 0.03  | 0.41  | 0.006  | 0.42    |  |
| 1.27                         | 1.17     | 1.37   | 0.016 | 0.23  | 0.002  | 0.16    |  |
| 7.17                         | 7.13     | 7.22   | 0.002 | 0.02  | 0      | 0.04    |  |
| 7.62                         | 7.56     | 7.65   | 0.002 | 0.03  | 0.001  | 0.04    |  |
| 8.09                         | 8.02     | 8.24   | 0.018 | 0.25  | 0.002  | 0.15    |  |
| 8.27                         | 8.24     | 8.33   | 0.003 | 0.04  | 0.001  | 0.06    |  |
| 8.59                         | 8.51     | 8.69   | 6.728 | 92.71 | 1.282  | 92.19   |  |
| 8.91                         | 8.86     | 8.92   | 0.001 | 0.02  | 0.001  | 0.05    |  |
| 8.96                         | 8.95     | 8.98   | 0.001 | 0.01  | 0.001  | 0.05    |  |
| 9.06                         | 9.02     | 9.08   | 0.003 | 0.04  | 0.001  | 0.05    |  |
| 9.11                         | 9.09     | 9.13   | 0.001 | 0.01  | 0.001  | 0.04    |  |
| 9.15                         | 9.13     | 9.17   | 0.001 | 0.01  | 0.001  | 0.06    |  |
| 9.25                         | 9.18     | 9.3    | 0.007 | 0.09  | 0.001  | 0.11    |  |
| 9.34                         | 9.3      | 9.35   | 0.003 | 0.05  | 0.001  | 0.1     |  |
| 9.38                         | 9.35     | 9.44   | 0.005 | 0.07  | 0.001  | 0.1     |  |
| 9.69                         | 9.58     | 9.74   | 0.01  | 0.14  | 0.002  | 0.13    |  |
| 9.77                         | 9.74     | 9.86   | 0.005 | 0.06  | 0.001  | 0.06    |  |
| 10.04                        | 9.96     | 10.14  | 0.015 | 0.21  | 0.003  | 0.19    |  |
| 10.42                        | 10.38    | 10.57  | 0.003 | 0.05  | 0      | 0.03    |  |
| 11.02                        | 10.98    | 11.05  | 0.001 | 0.02  | 0.001  | 0.04    |  |
| 11.32                        | 11.25    | 11.35  | 0.002 | 0.03  | 0.001  | 0.05    |  |
| 11.66                        | 11.65    | 11.69  | 0.001 | 0.01  | 0.001  | 0.04    |  |
| 12.36                        | 12.31    | 12.39  | 0.002 | 0.03  | 0.001  | 0.04    |  |
| 15.39                        | 15.35    | 15.47  | 0.005 | 0.07  | 0.001  | 0.09    |  |
| 16.6                         | 16.53    | 16.71  | 0.009 | 0.12  | 0.001  | 0.1     |  |
| 19.47                        | 19.4     | 19.57  | 0.316 | 4.36  | 0.059  | 4.27    |  |
| 19.59                        | 19.58    | 19.62  | 0.006 | 0.08  | 0.005  | 0.36    |  |
| 19.64                        | 19.63    | 19.68  | 0.008 | 0.1   | 0.004  | 0.31    |  |
| 19.7                         | 19.68    | 19.71  | 0.003 | 0.04  | 0.003  | 0.18    |  |
| 19.83                        | 19.72    | 19.96  | 0.05  | 0.69  | 0.006  | 0.46    |  |

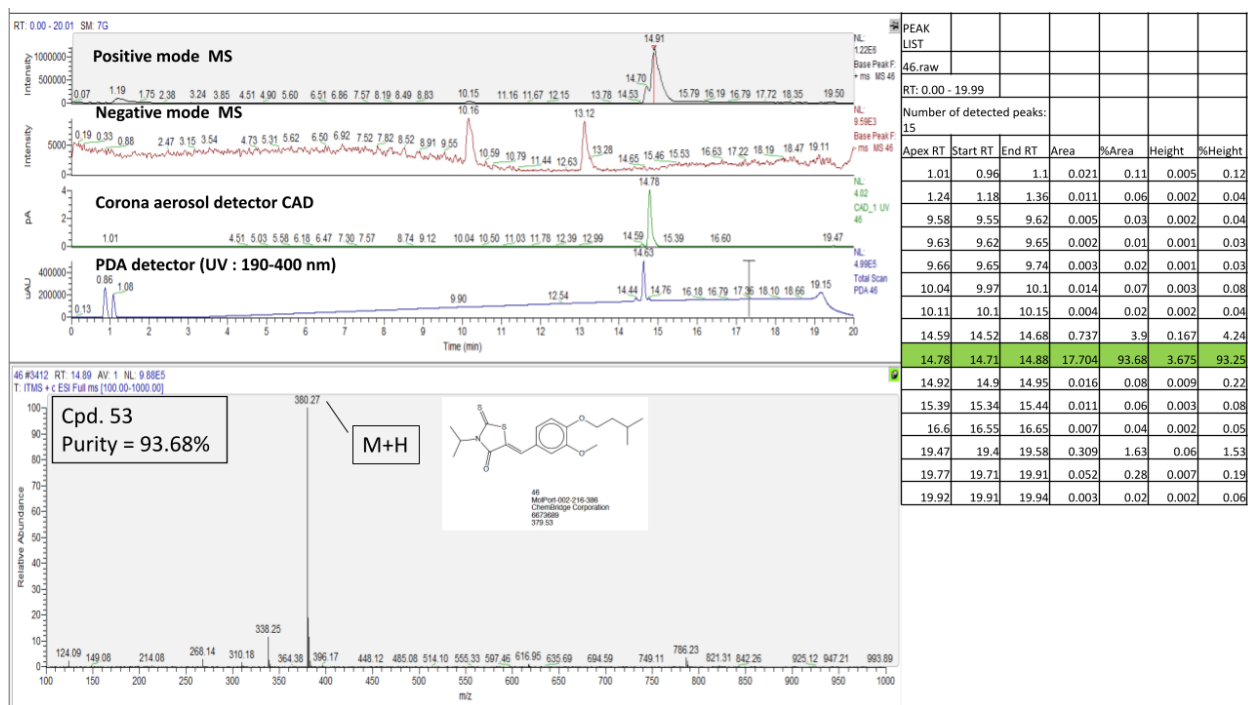

Figure S1. Mass-spec data.

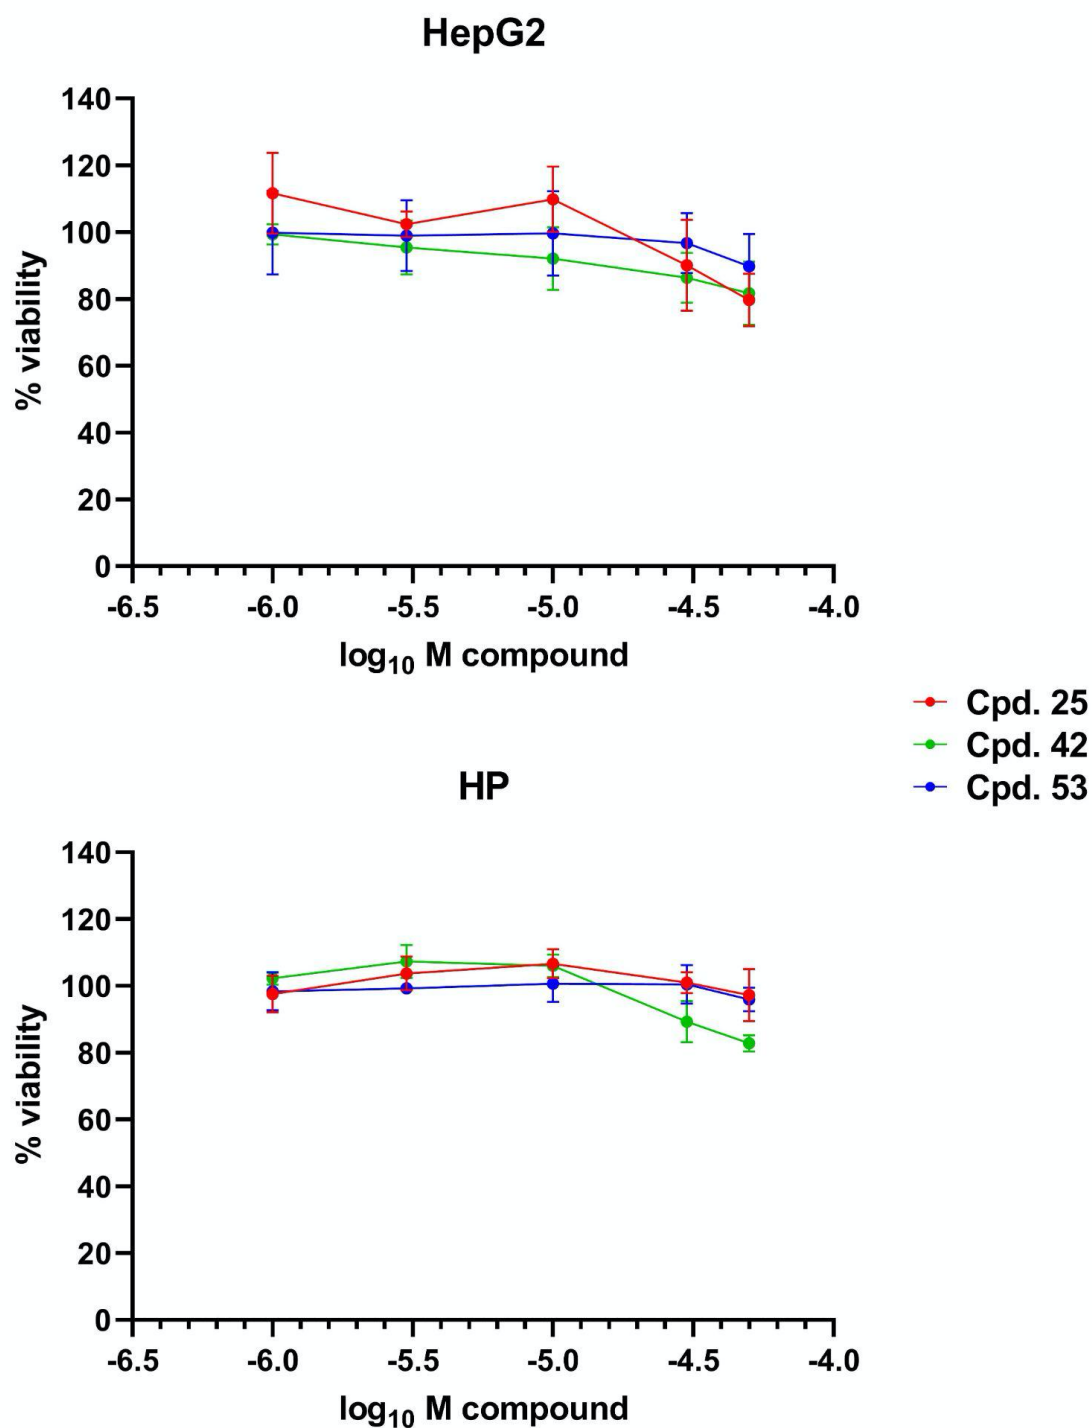

**Figure S2.** Cell toxicity of novel compounds. HepG2 or HP cells were treated with increasing concentrations (1-50  $\mu$ M) of the indicated compounds for 24 h. Viability was determined based on ATP content and compared to the ATP content of cells treated with vehicle DMSO only (0.1% in case of compounds **25** and **42**, 0.17% for compound **53**), which was set as 100%, respectively. Means  $\pm$  S.D. (n = 3) are shown.

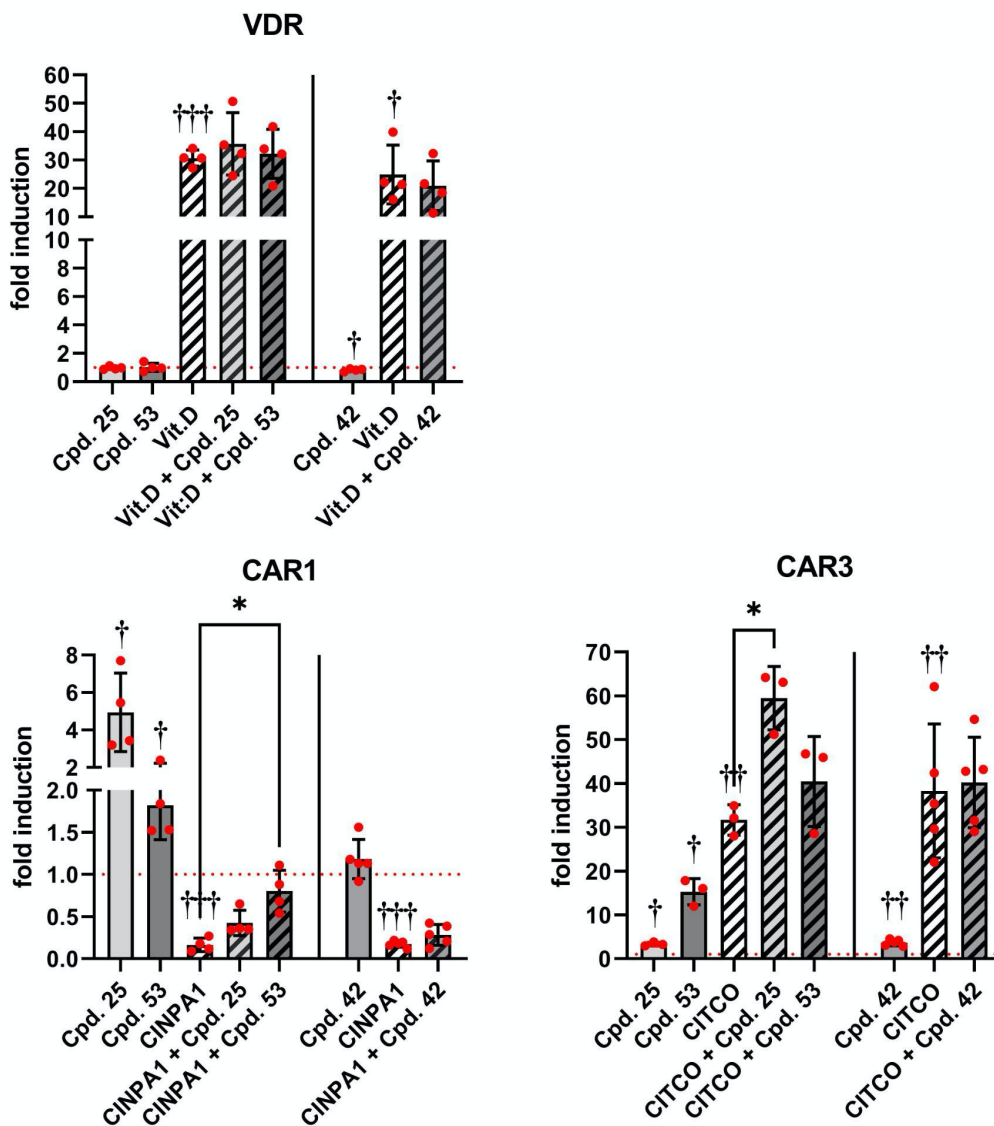

**Figure S3.** Selectivity of novel compounds within the NR1I group of nuclear receptors. HepG2 cells were transfected with expression plasmids encoding the indicated human nuclear receptors and treated for 24 h with 0.1  $\mu$ M 1 $\alpha$ ,25-dihydroxyvitamin D3 (Vit.D), 1  $\mu$ M CINPA1, 10  $\mu$ M CITCO and/or 10  $\mu$ M of the indicated compounds. In case of CAR3, RXR $\alpha$  expression plasmid was transfected additionally. Data are shown as means  $\pm$  S.D. of normalized firefly luciferase activity of co—transfected reporter gene plasmids (DR3)<sub>3</sub>-Tk (VDR) or CYP2B6 enhancer/promoter (CAR1, CAR3), relative to the activity of respectively transfected cells treated with 0.2% DMSO only, which was set as 1 (red dotted lines). The results of independent experiments ( $n \geq 3$ ) are illustrated as dots. Differences to respective treatments with DMSO only (daggers, exclusively for single compound treatments) were analyzed by one sample t-test. Differences to treatment with respective prototypical agonists (Vit.D – VDR; CITCO – CAR3) or inverse agonist (CINPA1 – CAR1) (asterisks, exclusively for co-treatments) were analyzed by repeated measures one-way ANOVA with Dunnett's multiple comparisons test. In the case of comparisons with co-treatments involving compound 42, paired t-test was applied instead. \*, †  $p < 0.05$ ; ††  $p < 0.01$ ; †††  $p < 0.001$ .
